# Supplementary material for: The plastid genome and its implications in barcoding specific-chemotypes of the medicinal herb Pogostemon cablin in China
Source: PubMed Central journal article supplement (PMC6464210; doi:10.1371/journal.pone.0215512), 2019-04-15
Supplement: pone.0215512.s004.pdf [file pone.0215512.s004.pdf]

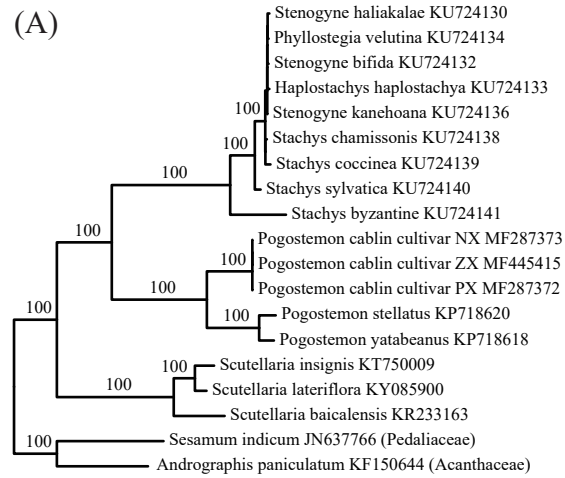

0.006

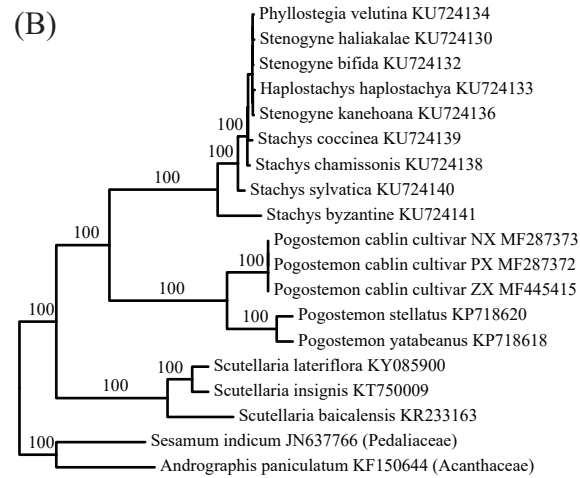

0.02

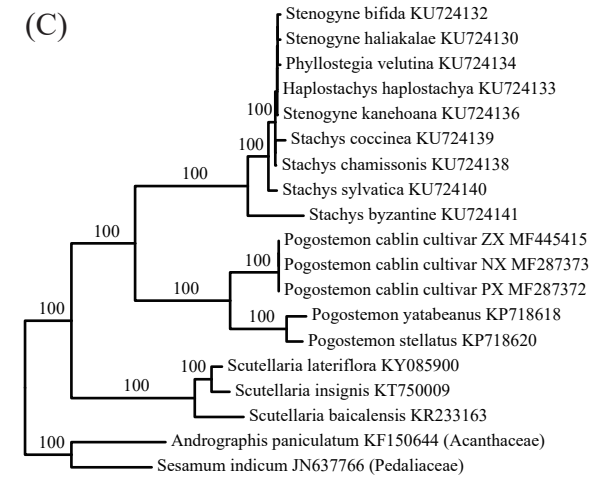

0.008

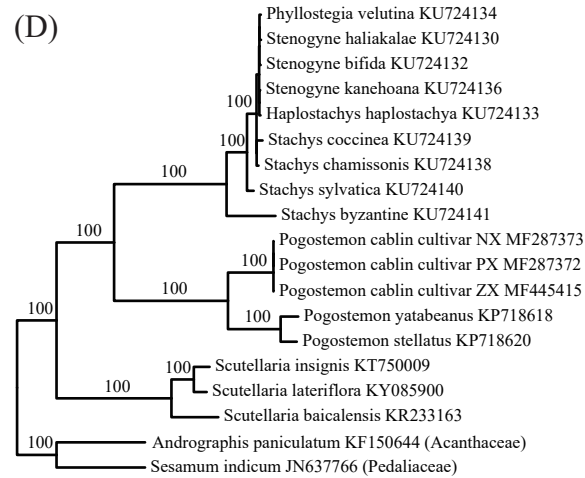

0.009

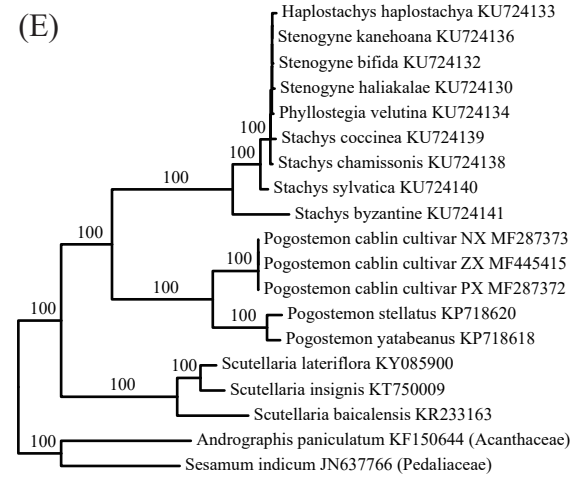

0.02

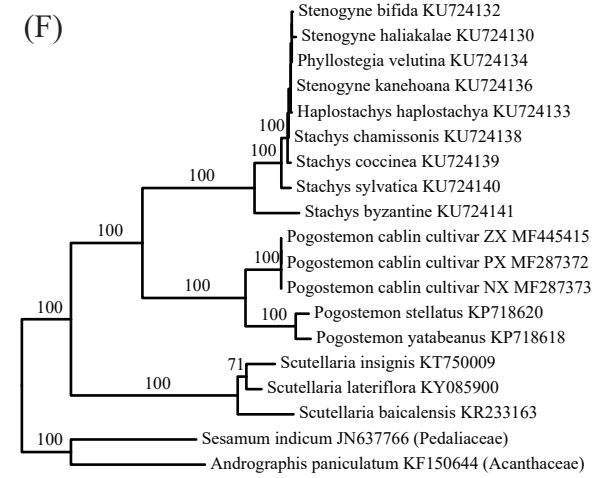

0.002
